# Supplementary material for: Boosting CO2 electroreduction over layered zeolitic imidazolate frameworks decorated with Ag2O nanoparticles
Source: Royal Society of Chemistry journal article supplement (doi:10.1039/c7ta06114e), 2017-01-01
Supplement: c7ta06114e1.pdf [file c7ta06114e1.pdf]

## Supporting Information

### **Boosting CO<sub>2</sub> electroreduction over layered zeolitic imidazolate framework decorated with Ag<sub>2</sub>O nanoparticles**

Xiaole Jiang,<sup>a,b</sup> Haihua Wu,<sup>a,b</sup> Sujie Chang,<sup>c</sup> Rui Si,<sup>d</sup> Shu Miao,<sup>a</sup> Weixin Huang,<sup>c</sup> Yanshuo Li,<sup>\*,e</sup> Guoxiong Wang,<sup>\*,a</sup> and Xinhe Bao<sup>\*,a</sup>

<sup>a</sup>*State Key Laboratory of Catalysis, CAS Center for Excellence in Nanoscience, Dalian National Laboratory for Clean Energy, Dalian Institute of Chemical Physics, Chinese Academy of Sciences, Dalian, 116023, China.*

<sup>b</sup>*University of Chinese Academy of Sciences, Beijing, 100039, China.*

<sup>c</sup>*CAS Key Laboratory of Materials for Energy Conversion and Department of Chemical Physics, University of Science and Technology of China, Hefei, 230026, China*

<sup>d</sup>*Shanghai Synchrotron Radiation Facility, Shanghai Institute of Applied Physics, Chinese Academy of Sciences, Shanghai, 201204, China.*

<sup>e</sup>*School of Material Science and Chemical Engineering, Ningbo University, Ningbo, 315211, China.*

*\*E-mail addresses: liyanshuo@nbu.edu.cn, wanggx@dicp.ac.cn, xhbao@dicp.ac.cn.*

Table S1 The loadings of Ag in different catalysts measured by ICP-OES.

| Catalyst          | Ag <sub>2</sub> O/layered ZIF | Ag/layered ZIF | Ag/C |
|-------------------|-------------------------------|----------------|------|
| Ag loading (wt.%) | 11.5                          | 14.0           | 10.7 |

Table S2 The electrochemical surface areas (ESAs) of different catalysts.

| Catalyst                              | ZIF-7 | Layered ZIF | Ag/layered ZIF | Ag <sub>2</sub> O/layered ZIF |
|---------------------------------------|-------|-------------|----------------|-------------------------------|
| ESA (m <sup>2</sup> g <sup>-1</sup> ) | 2.17  | 4.42        | 4.40           | 4.80                          |

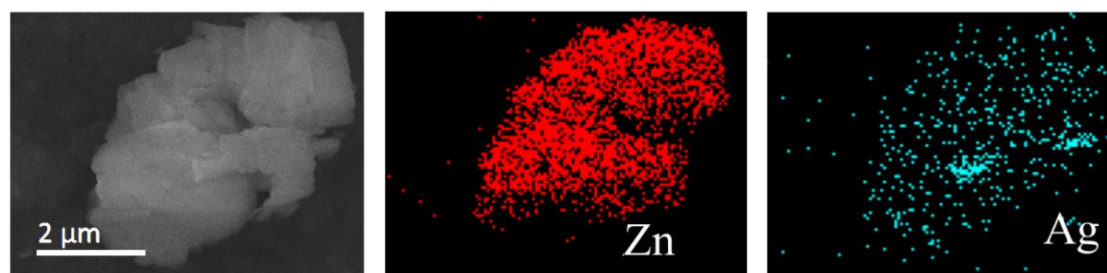

Fig. S1. SEM image with the corresponding EDS mappings of Zn and Ag elements in Ag<sub>2</sub>O/layered ZIF catalyst.

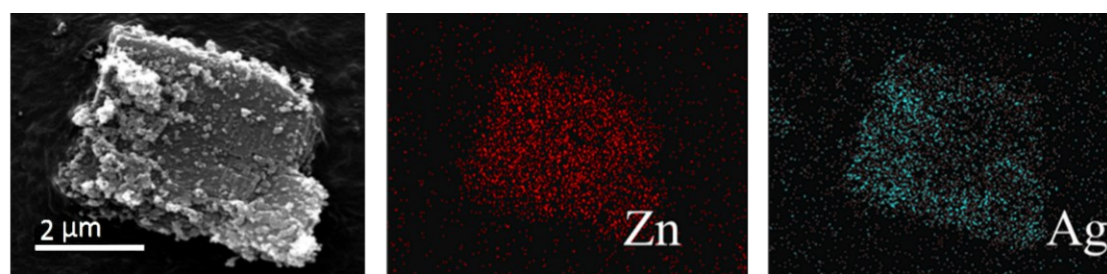

Fig. S2. SEM image with the corresponding EDS mappings of Zn and Ag elements in Ag/layered ZIF catalyst.

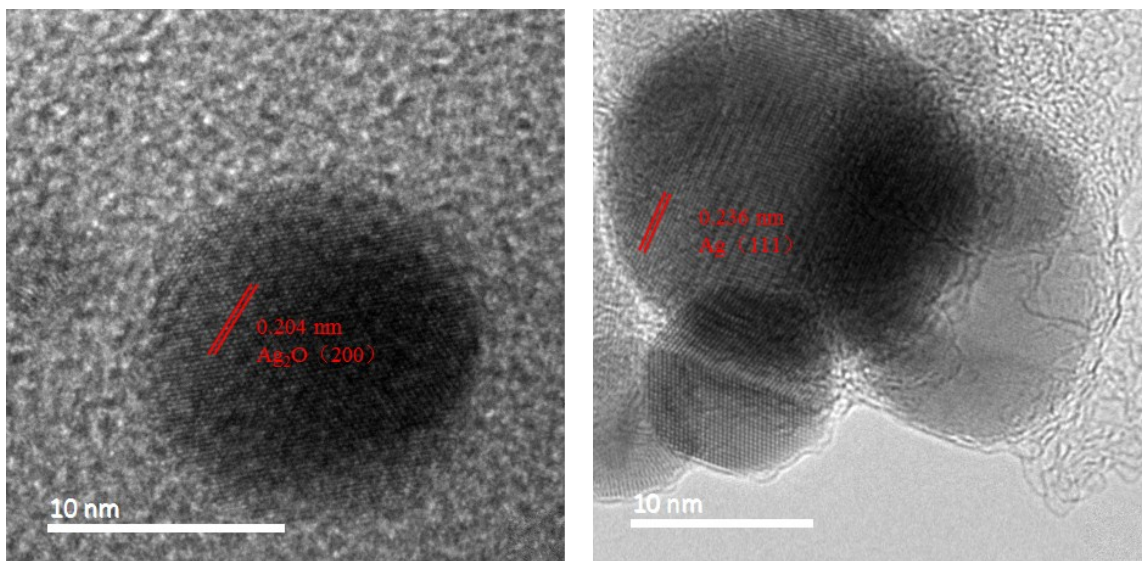

Fig. S3. HRTEM images of (a) Ag<sub>2</sub>O/layered ZIF and (b) Ag/layered ZIF catalysts.

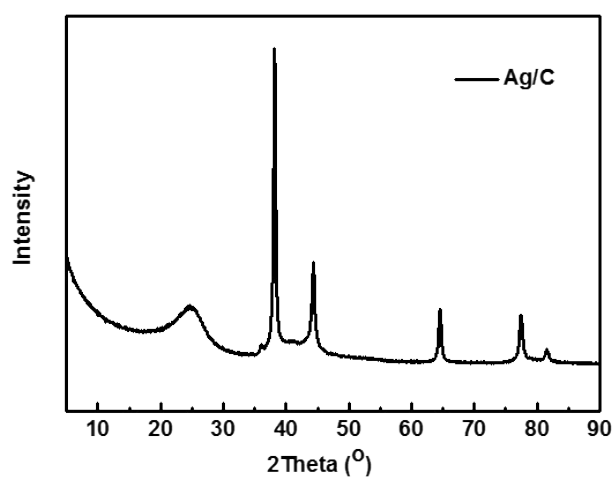

Fig. S4. XRD pattern of Ag/C catalyst.

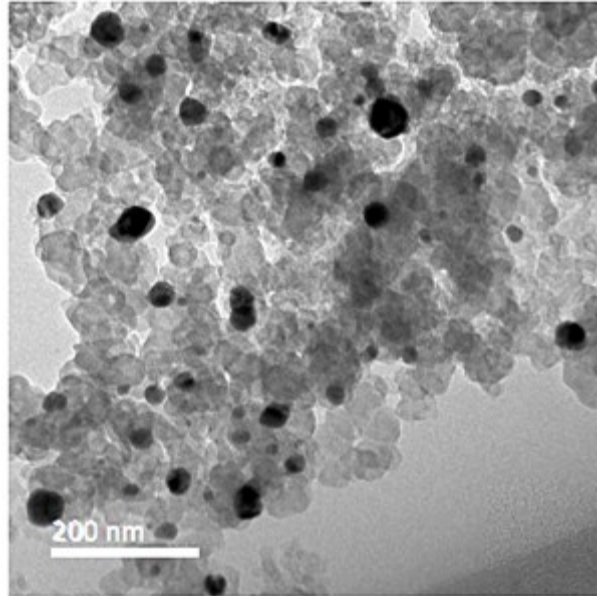

Fig. S5. TEM image of Ag/C catalyst.

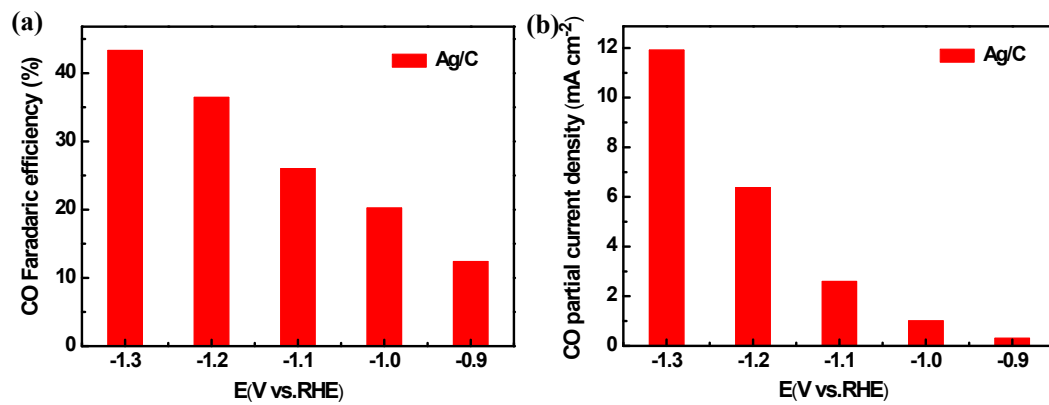

Fig. S6. The applied potential dependence of (a) Faradaic efficiency and (b) geometric partial current density for CO production over Ag/C catalyst in CO<sub>2</sub>-saturated 0.25 M K<sub>2</sub>SO<sub>4</sub> solution.
